# Supplementary material for: Time to diagnosis of Type I or II invasive epithelial ovarian cancers: a multicentre observational study using patient questionnaire and primary care records
Source: PubMed Central journal article supplement (PMC4855631; doi:10.1111/1471-0528.13447), 2015-05-29

**Figure S1a Time from first symptom to presentation by stage at diagnosis and by tumour type – cumulative proportion of women**

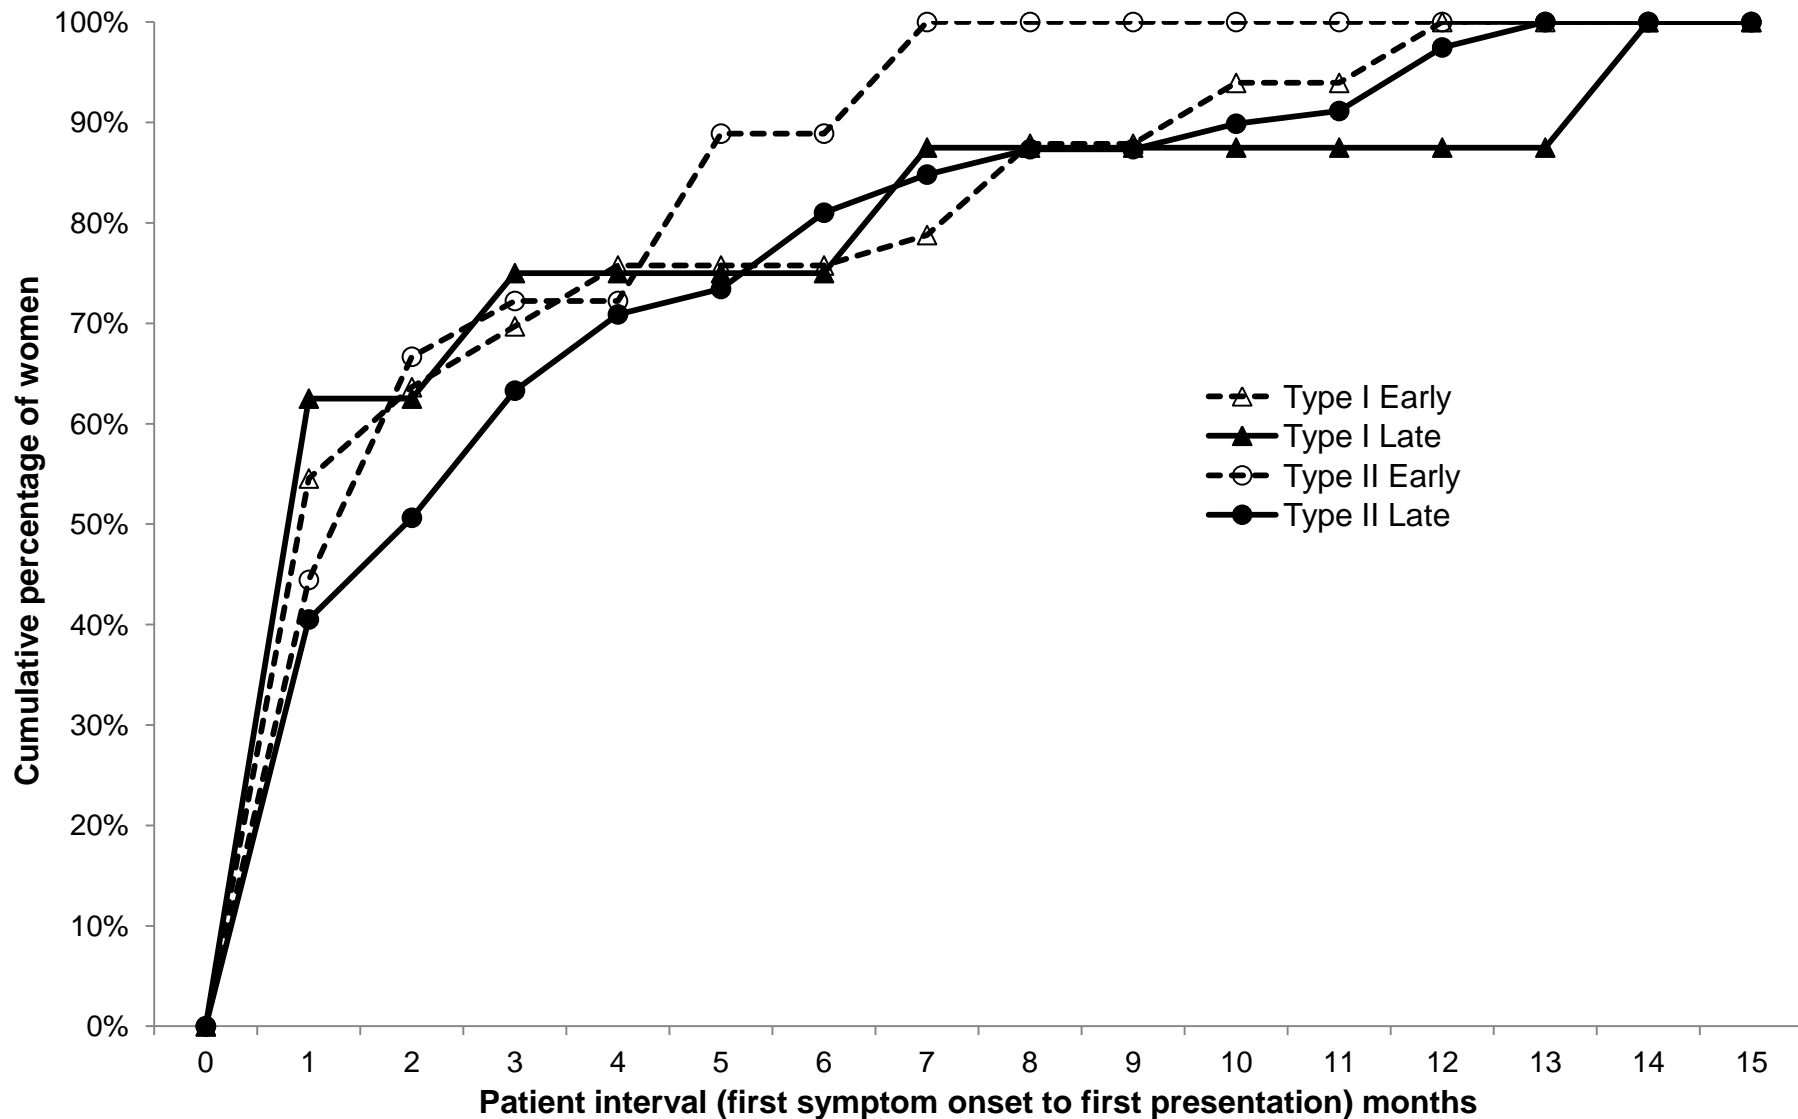

**Figure S1b Time from presentation to diagnosis by stage at diagnosis and by tumour type – cumulative proportion of women**

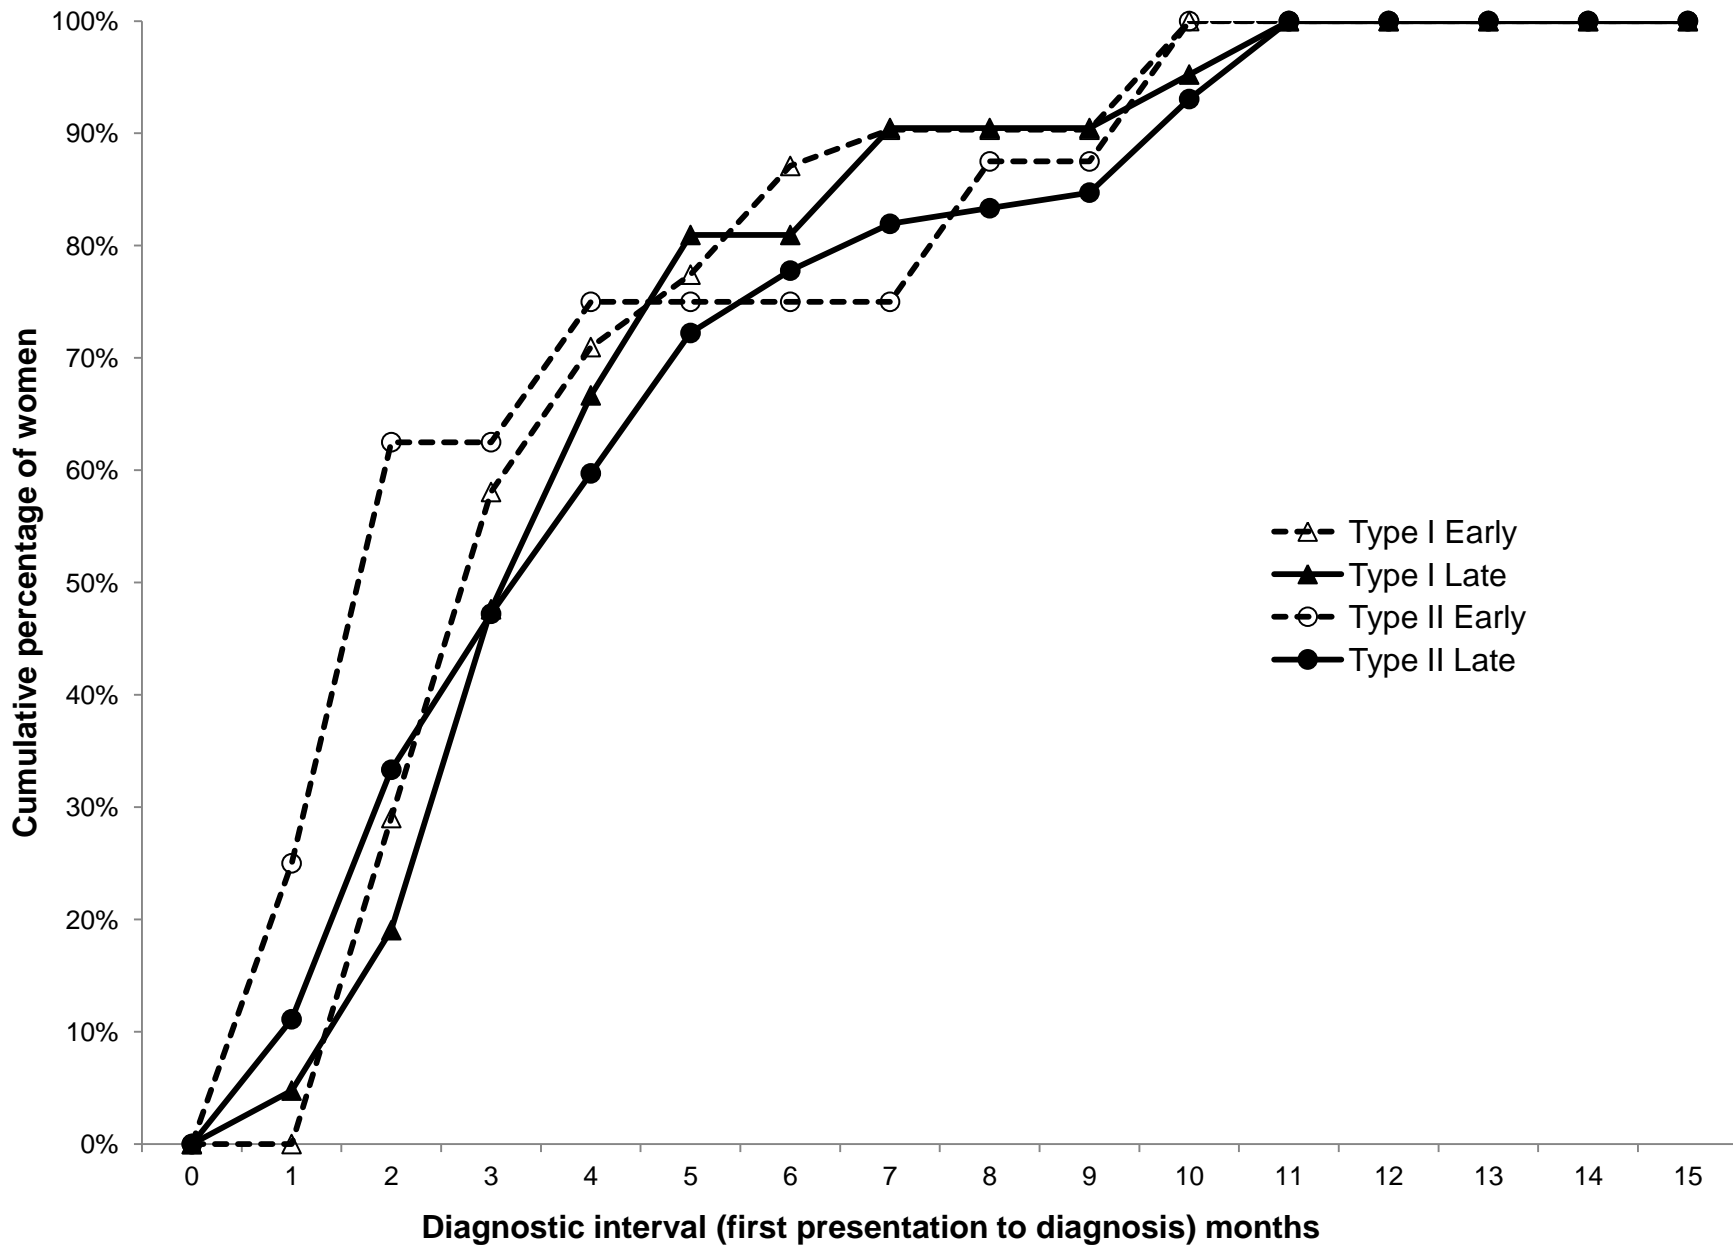

Supplement: BJO-123-1012-s001.pdf [file BJO-123-1012-s001.pdf]
