# Supplementary material for: Time to diagnosis of Type I or II invasive epithelial ovarian cancers: a multicentre observational study using patient questionnaire and primary care records
Source: PubMed Central journal article supplement (PMC4855631; doi:10.1111/1471-0528.13447), 2015-05-29
Supplement: BJO-123-1012-s002.pdf [file BJO-123-1012-s002.pdf]

**Table S1.** Time to diagnosis intervals (months) by tumour type

|                            | <b>Median (IQR)<br/>months</b> | <b>No. with interval</b> |
|----------------------------|--------------------------------|--------------------------|
| <b>Patient Interval</b>    |                                |                          |
| Type I                     | 0.3 (0.3, 3.0)                 | 41                       |
| Type II                    | 1.0 (0.3, 4.9)                 | 98                       |
| iEOC                       | 1.0 (0.3, 4.9)                 | 139                      |
| Borderline                 | 3.0 (0.3, 5.9)                 | 21                       |
| <b>Diagnostic Interval</b> |                                |                          |
| Type I                     | 3.3 (1.9, 9.3)                 | 48                       |
| Type II                    | 4.0 (1.8, 9.2)                 | 110                      |
| iEOC                       | 3.6 (1.9, 9.2)                 | 158                      |
| Borderline                 | 4.5 (1.6, 10.5)                | 24                       |

Note: Patient interval is derived from questionnaire data, diagnostic interval is derived from primary care record data. iEOC=invasive epithelial ovarian cancer, IQR=interquartile range.
