# Supplementary material for: Time to diagnosis of Type I or II invasive epithelial ovarian cancers: a multicentre observational study using patient questionnaire and primary care records
Source: PubMed Central journal article supplement (PMC4855631; doi:10.1111/1471-0528.13447), 2015-05-29
Supplement: BJO-123-1012-s003.pdf [file BJO-123-1012-s003.pdf]

**Table S2.** Total intervals (months) for early versus late stage Type I and II tumours

|             | Total interval |            |            |             |                   |                 |             |            |             |                   |
|-------------|----------------|------------|------------|-------------|-------------------|-----------------|-------------|------------|-------------|-------------------|
|             | Type I<br>n=32 |            |            |             |                   | Type II<br>n=77 |             |            |             |                   |
|             | 0-<3m          | 3-<6m      | 6-<9m      | ≥9m         | No. with interval | 0-<3m           | 3-<6m       | 6-<9m      | ≥9m         | No. with interval |
| Early stage | 7<br>(28%)     | 4<br>(16%) | 3<br>(12%) | 11<br>(44%) | 25                | 3<br>(19%)      | 4<br>(25%)  | 6<br>(38%) | 3<br>(19%)  | 16                |
| Late stage  | 3*<br>(43%)    | 0<br>(0%)  | 0<br>(0%)  | 4<br>(57%)  | 7                 | 11**<br>(18%)   | 13<br>(21%) | 7<br>(11%) | 30<br>(49%) | 61                |

Excludes women with missing stage or time to diagnosis intervals.

\*1 presented as an emergency, \*\*3 presented as an emergency
